# Supplementary material for: Mediterranean Diet to Prevent the Development of Colon Diseases: A Meta-Analysis of Gut Microbiota Studies
Source: MDPI journal article supplement (doi:10.3390/nu13072234), 2021-06-29
Supplement: s1 [file s1]

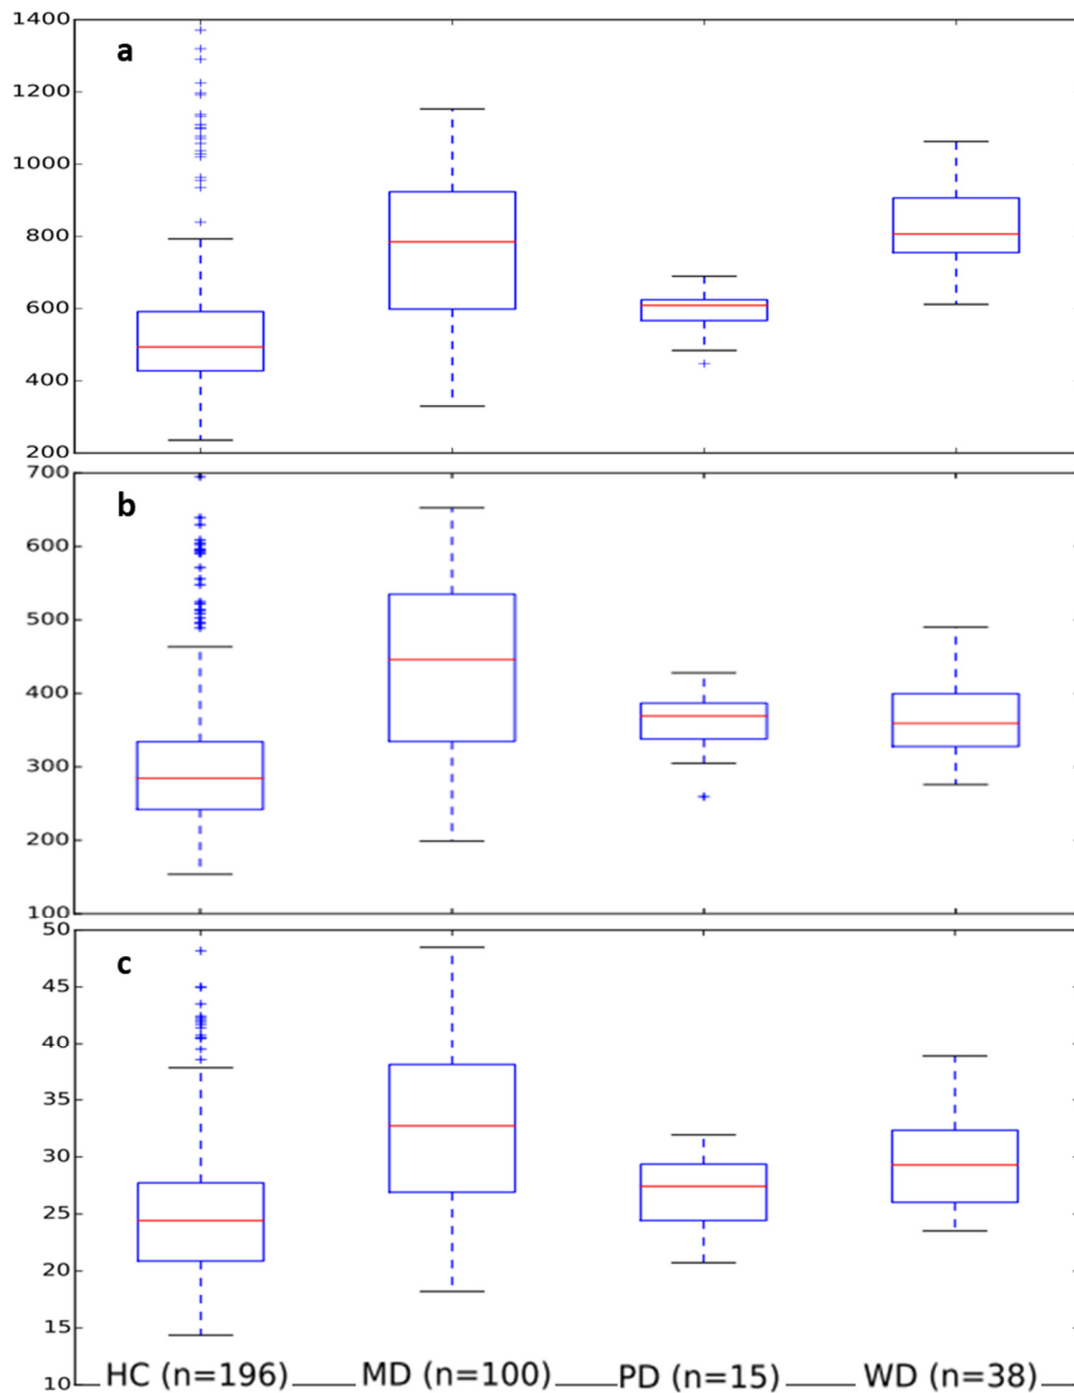

Figure S1. Alpha diversity comparison between diets. Comparison of healthy subjects following a non-defined diet (HC), Mediterranean diet (MD), Modern paleolithic diet (PD) or Western-type diet (WD). Alpha diversity metrics used were **a)** Chao1, **b)** total observed OTUs and **c)** phylogenetic distance.

Table S8. Alpha diversity iet groups pairings comparisons. Non-parametric T-test results.

| Metric                   | Group1 | Group2 | Group1<br>mean | Group1<br>stdev | Group2<br>mean | Group2<br>stdev | t stat | p-value* | p-value** |
|--------------------------|--------|--------|----------------|-----------------|----------------|-----------------|--------|----------|-----------|
| Chao1                    | PD     | HC     | 590.74         | 66.61           | 560.73         | 222.87          | 0.517  | 1        | 0.609     |
|                          | WD     | HC     | 826.14         | 112.10          | 560.73         | 222.87          | 7.137  | 0.006    | 0.006     |
|                          | MD     | PD     | 767.15         | 198.06          | 590.74         | 66.61           | 3.391  | 0.006    | 0.003     |
|                          | MD     | HC     | 767.15         | 198.06          | 560.73         | 222.87          | 7.793  | 0.006    | 0.003     |
|                          | WD     | PD     | 826.14         | 112.10          | 590.74         | 66.61           | 7.474  | 0.006    | 0.002     |
|                          | MD     | WD     | 767.15         | 198.06          | 826.14         | 112.10          | -1.721 | 0.552    | 0.104     |
| Observed<br>OTUs         | PD     | HC     | 361.55         | 43.86           | 309.95         | 108.11          | 1.828  | 0.414    | 0.086     |
|                          | WD     | HC     | 360.41         | 48.47           | 309.95         | 108.11          | 2.811  | 0.024    | 0.01      |
|                          | MD     | PD     | 439.23         | 123.85          | 361.55         | 43.86           | 2.386  | 0.144    | 0.021     |
|                          | MD     | HC     | 439.23         | 123.85          | 309.95         | 108.11          | 9.223  | 0.006    | 0.006     |
|                          | WD     | PD     | 360.41         | 48.47           | 361.55         | 43.86           | -0.078 | 1        | 0.945     |
|                          | MD     | WD     | 439.23         | 123.85          | 360.41         | 48.47           | 3.786  | 0.006    | 0.003     |
| Phylogenetic<br>distance | PD     | HC     | 27.26          | 3.28            | 25.45          | 6.75            | 1.022  | 1        | 0.333     |
|                          | WD     | HC     | 29.59          | 3.80            | 25.45          | 6.75            | 3.646  | 0.018    | 0.006     |
|                          | MD     | PD     | 32.66          | 7.64            | 27.26          | 3.28            | 2.677  | 0.024    | 0.012     |
|                          | MD     | HC     | 32.66          | 7.64            | 25.45          | 6.75            | 8.274  | 0.006    | 0.006     |
|                          | WD     | PD     | 29.59          | 3.80            | 27.26          | 3.28            | 2.046  | 0.312    | 0.050     |
|                          | MD     | WD     | 32.66          | 7.64            | 29.59          | 3.80            | 2.356  | 0.144    | 0.026     |

\*Bonferroni corrected. \*\*False discovery rate corrected.

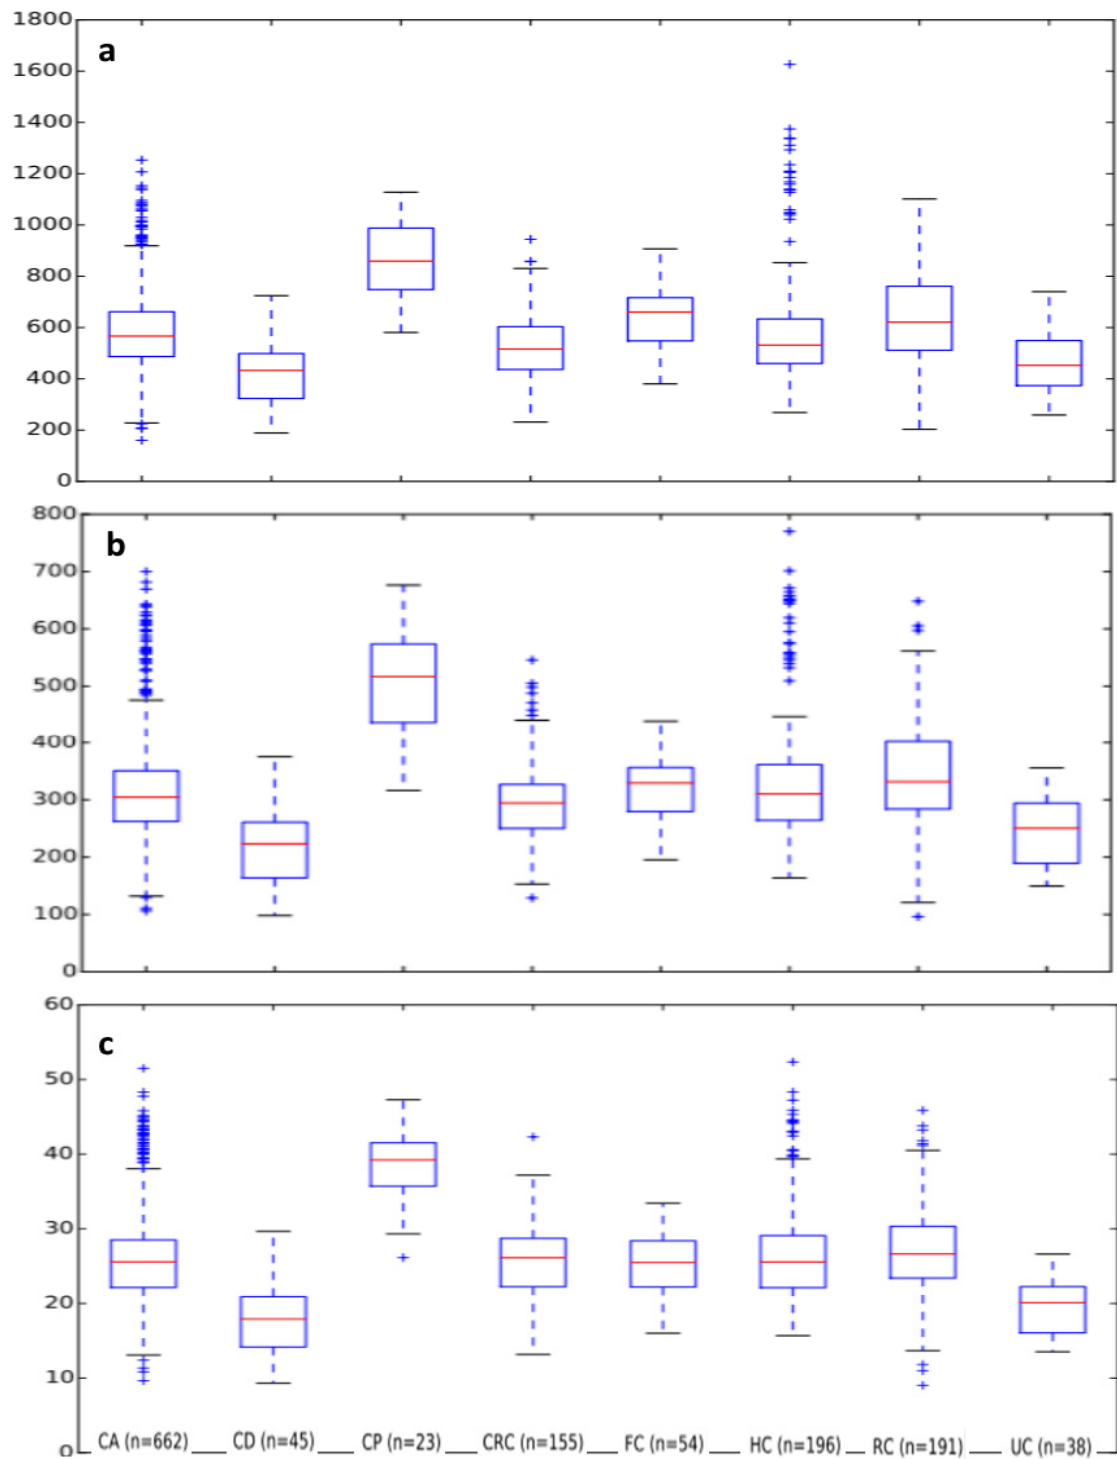

Figure S2. Alpha diversity comparison between diseases. Comparison of healthy subjects (HC), at-risk controls (RC), IBD patients familiars (FC), colon polyposis (CP), colon adenomatosis (CA), colorectal cancer (CRC), ulcerative colitis (UC) and Crohn's disease (CD) patients. Alpha diversity metrics used were **a)** Chao1, **b)** total observed OTUs and **c)** phylogenetic distance.

Table S9. Alpha diversity disease groups pairings comparisons. Non-parametric T-test results.

| Metric        | Group1 | Group2 | Group1 mean | Group1 stdev | Group2 mean | Group2 stdev | t stat  | p-value* | p-value** |
|---------------|--------|--------|-------------|--------------|-------------|--------------|---------|----------|-----------|
| Chao1         | CD     | CP     | 420.07      | 125.92       | 860.43      | 151.77       | -12.517 | 0.028    | 0.028     |
|               | CD     | HC     | 420.07      | 125.92       | 603.73      | 241.45       | -4.930  | 0.028    | 0.002     |
|               | CD     | UC     | 420.07      | 125.92       | 462.23      | 115.27       | -1.560  | 1        | 0.138     |
|               | CA     | FC     | 586.16      | 163.27       | 636.52      | 114.10       | -2.219  | 0.84     | 0.037     |
|               | CA     | CD     | 586.16      | 163.27       | 420.07      | 125.92       | 6.681   | 0.028    | 0.002     |
|               | CA     | UC     | 586.16      | 163.27       | 462.23      | 115.27       | 4.607   | 0.028    | 0.003     |
|               | CRC    | HC     | 523.50      | 128.77       | 603.73      | 241.45       | -3.727  | 0.028    | 0.002     |
|               | CRC    | RS     | 523.50      | 128.77       | 632.42      | 170.82       | -6.549  | 0.028    | 0.002     |
|               | FC     | RS     | 636.52      | 114.10       | 632.42      | 170.82       | 0.165   | 1        | 0.857     |
|               | CRC    | CP     | 523.50      | 128.77       | 860.43      | 151.77       | -11.362 | 0.028    | 0.002     |
|               | CD     | CRC    | 420.07      | 125.92       | 523.50      | 128.77       | -4.743  | 0.028    | 0.001     |
|               | FC     | CP     | 636.52      | 114.10       | 860.43      | 151.77       | -7.014  | 0.028    | 0.003     |
|               | CA     | HC     | 586.16      | 163.27       | 603.73      | 241.45       | -1.172  | 1        | 0.251     |
|               | FC     | HC     | 636.52      | 114.10       | 603.73      | 241.45       | 0.965   | 1        | 0.371     |
|               | CA     | CP     | 586.16      | 163.27       | 860.43      | 151.77       | -7.927  | 0.028    | 0.003     |
|               | CA     | RS     | 586.16      | 163.27       | 632.42      | 170.82       | -3.409  | 0.028    | 0.003     |
|               | CD     | FC     | 420.07      | 125.92       | 636.52      | 114.10       | -8.874  | 0.028    | 0.009     |
|               | CRC    | FC     | 523.50      | 128.77       | 636.52      | 114.10       | -5.688  | 0.028    | 0.002     |
|               | HC     | UC     | 603.73      | 241.45       | 462.23      | 115.27       | 3.520   | 0.028    | 0.003     |
|               | CD     | RS     | 420.07      | 125.92       | 632.42      | 170.82       | -7.818  | 0.028    | 0.004     |
|               | CA     | CRC    | 586.16      | 163.27       | 523.50      | 128.77       | 4.459   | 0.028    | 0.004     |
|               | CRC    | UC     | 523.50      | 128.77       | 462.23      | 115.27       | 2.667   | 0.308    | 0.011     |
|               | HC     | CP     | 603.73      | 241.45       | 860.43      | 151.77       | -4.962  | 0.028    | 0.006     |
|               | CP     | UC     | 860.43      | 151.77       | 462.23      | 115.27       | 11.382  | 0.028    | 0.007     |
|               | RS     | CP     | 632.42      | 170.82       | 860.43      | 151.77       | -6.089  | 0.028    | 0.005     |
|               | FC     | UC     | 636.52      | 114.10       | 462.23      | 115.27       | 7.105   | 0.028    | 0.014     |
|               | RS     | HC     | 632.42      | 170.82       | 603.73      | 241.45       | 1.343   | 1        | 0.199     |
|               | RS     | UC     | 632.42      | 170.82       | 462.23      | 115.27       | 5.855   | 0.028    | 0.002     |
| Observed OTUs | CD     | CP     | 211.57      | 62.84        | 502.25      | 92.90        | -15.021 | 0.028    | 0.028     |
|               | CD     | HC     | 211.57      | 62.84        | 336.92      | 118.19       | -6.865  | 0.028    | 0.001     |
|               | CD     | UC     | 211.57      | 62.84        | 242.73      | 59.39        | -2.280  | 0.812    | 0.028     |
|               | CA     | FC     | 318.53      | 93.51        | 320.37      | 54.27        | -0.142  | 1        | 0.884     |
|               | CA     | CD     | 318.53      | 93.51        | 211.57      | 62.84        | 7.547   | 0.028    | 0.002     |
|               | CA     | UC     | 318.53      | 93.51        | 242.73      | 59.39        | 4.933   | 0.028    | 0.003     |
|               | CRC    | HC     | 297.58      | 72.11        | 336.92      | 118.19       | -3.633  | 0.028    | 0.002     |
|               | CRC    | RS     | 297.58      | 72.11        | 344.83      | 94.97        | -5.098  | 0.028    | 0.002     |
|               | FC     | RS     | 320.37      | 54.27        | 344.83      | 94.97        | -1.803  | 1        | 0.072     |
|               | CRC    | CP     | 297.58      | 72.11        | 502.25      | 92.90        | -12.124 | 0.028    | 0.002     |
|               | CD     | CRC    | 211.57      | 62.84        | 297.58      | 72.11        | -7.206  | 0.028    | 0.002     |
|               | FC     | CP     | 320.37      | 54.27        | 502.25      | 92.90        | -10.580 | 0.028    | 0.001     |
|               | CA     | HC     | 318.53      | 93.51        | 336.92      | 118.19       | -2.266  | 0.728    | 0.028     |
|               | FC     | HC     | 320.37      | 54.27        | 336.92      | 118.19       | -0.997  | 1        | 0.352     |
|               | CA     | CP     | 318.53      | 93.51        | 502.25      | 92.90        | -9.252  | 0.028    | 0.003     |
|               | CA     | RS     | 318.53      | 93.51        | 344.83      | 94.97        | -3.408  | 0.028    | 0.003     |
|               | CD     | FC     | 211.57      | 62.84        | 320.37      | 54.27        | -9.148  | 0.028    | 0.009     |

\*Bonferroni corrected. \*\*False discovery rate corrected.

Table S9. Alpha diversity disease groups pairings comparisons. Non-parametric T-test results. (Continuation)

|                       | Group1 | Group2 | Group1 mean | Group1 stdev | Group2 mean | Group2 stdev | t stat  | p-value* | p-value** |
|-----------------------|--------|--------|-------------|--------------|-------------|--------------|---------|----------|-----------|
| Observed OTUs         | CRC    | FC     | 297.58      | 72.11        | 320.37      | 54.27        | -2.112  | 1        | 0.043     |
|                       | HC     | UC     | 336.92      | 118.19       | 242.73      | 59.39        | 4.776   | 0.028    | 0.004     |
|                       | CD     | RS     | 211.57      | 62.84        | 344.83      | 94.97        | -8.923  | 0.028    | 0.004     |
|                       | CA     | CRC    | 318.53      | 93.51        | 297.58      | 72.11        | 2.610   | 0.392    | 0.013     |
|                       | CRC    | UC     | 297.58      | 72.11        | 242.73      | 59.39        | 4.319   | 0.028    | 0.002     |
|                       | HC     | CP     | 336.92      | 118.19       | 502.25      | 92.90        | -6.448  | 0.028    | 0.006     |
|                       | CP     | UC     | 502.25      | 92.90        | 242.73      | 59.39        | 13.085  | 0.028    | 0.007     |
|                       | RS     | CP     | 344.83      | 94.97        | 502.25      | 92.90        | -7.492  | 0.028    | 0.005     |
|                       | FC     | UC     | 320.37      | 54.27        | 242.73      | 59.39        | 6.426   | 0.028    | 0.014     |
|                       | RS     | HC     | 344.83      | 94.97        | 336.92      | 118.19       | 0.722   | 1        | 0.465     |
|                       | RS     | UC     | 344.83      | 94.97        | 242.73      | 59.39        | 6.355   | 0.028    | 0.002     |
| Phylogenetic distance | CD     | CP     | 17.63       | 4.68         | 38.02       | 5.26         | -16.058 | 0.028    | 0.028     |
|                       | CD     | HC     | 17.63       | 4.68         | 26.83       | 7.19         | -8.162  | 0.028    | 0.002     |
|                       | CD     | UC     | 17.63       | 4.68         | 19.73       | 3.86         | -2.182  | 0.924    | 0.045     |
|                       | CA     | FC     | 26.16       | 6.30         | 25.42       | 4.34         | 0.847   | 1        | 0.473     |
|                       | CA     | CD     | 26.16       | 6.30         | 17.63       | 4.68         | 8.898   | 0.028    | 0.002     |
|                       | CA     | UC     | 26.16       | 6.30         | 19.73       | 3.86         | 6.208   | 0.028    | 0.003     |
|                       | CRC    | HC     | 25.88       | 4.93         | 26.83       | 7.19         | -1.400  | 1        | 0.201     |
|                       | CRC    | RS     | 25.88       | 4.93         | 27.05       | 6.25         | -1.905  | 1        | 0.080     |
|                       | FC     | RS     | 25.42       | 4.34         | 27.05       | 6.25         | -1.800  | 1        | 0.081     |
|                       | CRC    | CP     | 25.88       | 4.93         | 38.02       | 5.26         | -10.859 | 0.028    | 0.002     |
|                       | CD     | CRC    | 17.63       | 4.68         | 25.88       | 4.93         | -9.941  | 0.028    | 0.002     |
|                       | FC     | CP     | 25.42       | 4.34         | 38.02       | 5.26         | -10.789 | 0.028    | 0.003     |
|                       | CA     | HC     | 26.16       | 6.30         | 26.83       | 7.19         | -1.262  | 1        | 0.253     |
|                       | FC     | HC     | 25.42       | 4.34         | 26.83       | 7.19         | -1.370  | 1        | 0.234     |
|                       | CA     | CP     | 26.16       | 6.30         | 38.02       | 5.26         | -8.902  | 0.028    | 0.003     |
|                       | CA     | RS     | 26.16       | 6.30         | 27.05       | 6.25         | -1.733  | 1        | 0.112     |
|                       | CD     | FC     | 17.63       | 4.68         | 25.42       | 4.34         | -8.499  | 0.028    | 0.009     |
|                       | CRC    | FC     | 25.88       | 4.93         | 25.42       | 4.34         | 0.607   | 1        | 0.569     |
|                       | HC     | UC     | 26.83       | 7.19         | 19.73       | 3.86         | 5.897   | 0.028    | 0.004     |
|                       | CD     | RS     | 17.63       | 4.68         | 27.05       | 6.25         | -9.474  | 0.028    | 0.004     |
|                       | CA     | CRC    | 26.16       | 6.30         | 25.88       | 4.93         | 0.517   | 1        | 0.629     |
|                       | CRC    | UC     | 25.88       | 4.93         | 19.73       | 3.86         | 7.126   | 0.028    | 0.002     |
|                       | HC     | CP     | 26.83       | 7.19         | 38.02       | 5.26         | -7.210  | 0.028    | 0.006     |
|                       | CP     | UC     | 38.02       | 5.26         | 19.73       | 3.86         | 15.341  | 0.028    | 0.007     |
|                       | RS     | CP     | 27.05       | 6.25         | 38.02       | 5.26         | -8.043  | 0.028    | 0.005     |
|                       | FC     | UC     | 25.42       | 4.34         | 19.73       | 3.86         | 6.407   | 0.028    | 0.014     |
|                       | RS     | HC     | 27.05       | 6.25         | 26.83       | 7.19         | 0.330   | 1        | 0.765     |
|                       | RS     | UC     | 27.05       | 6.25         | 19.73       | 3.86         | 6.937   | 0.028    | 0.002     |

\*Bonferroni corrected. \*\*False discovery rate corrected.

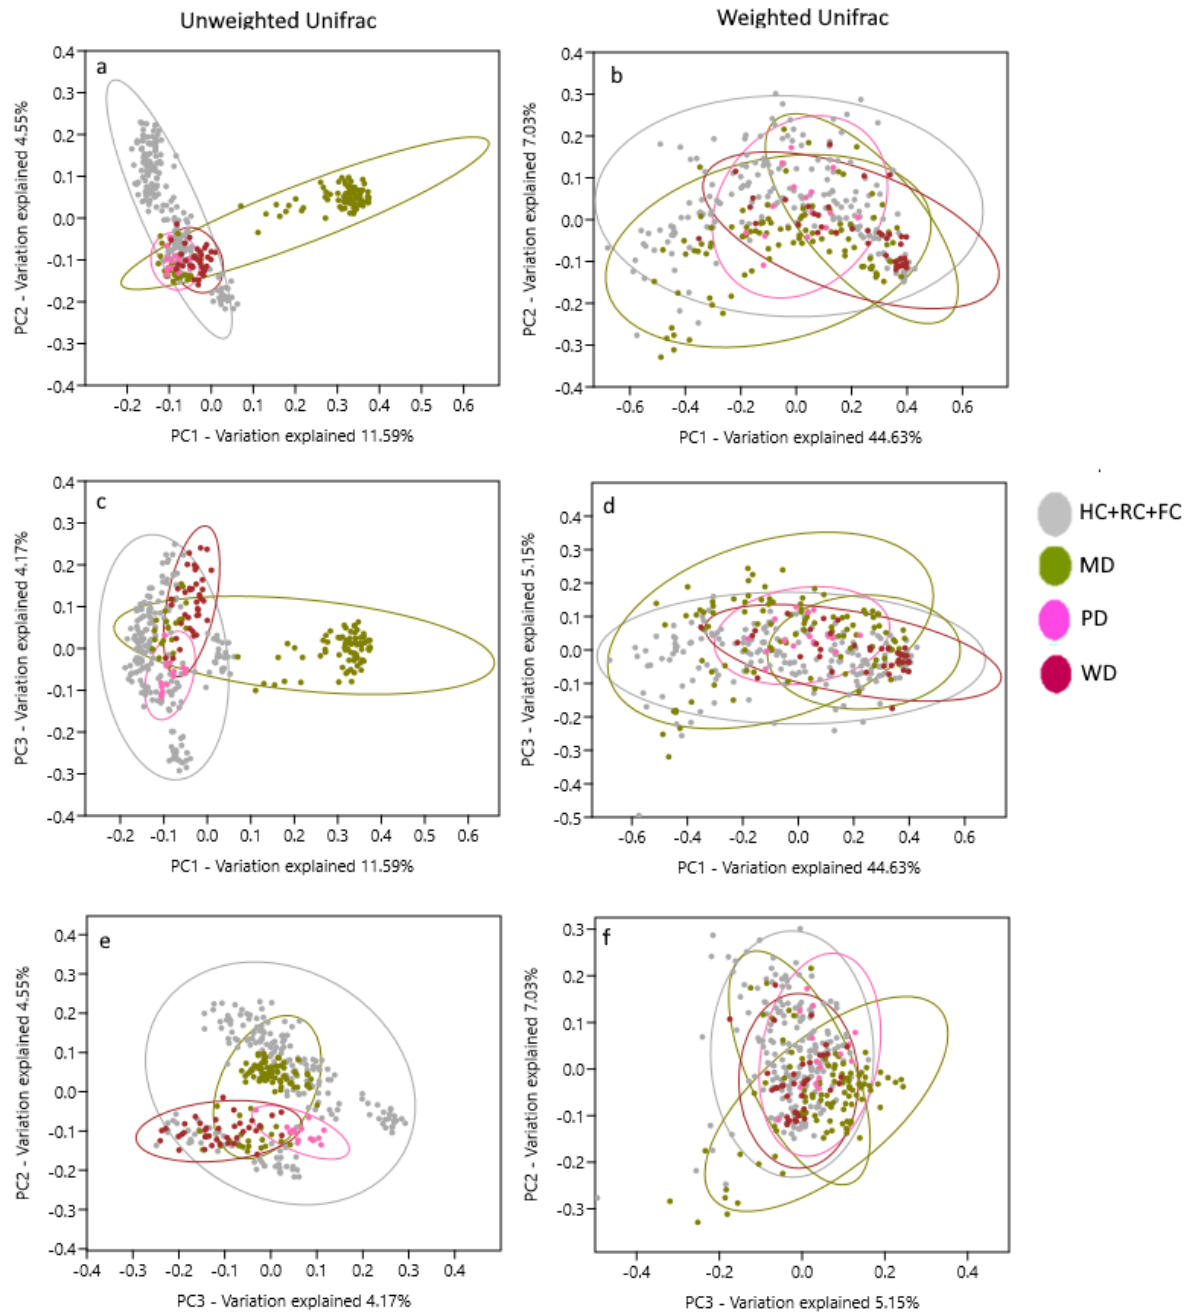

Figure S3. Beta diversity principal coordinates (PCoA) analysis of diets. Comparison of healthy subjects following a non-defined diet (HC+RC+FC), a Mediterranean diet (MD), a modern paleolithic diet (PD) or a western-type diet (WD). The Unifrac distance metric either unweighted (a, c, e) and weighted (b, d, f) was used. Ellipses indicate 95% confidence intervals.

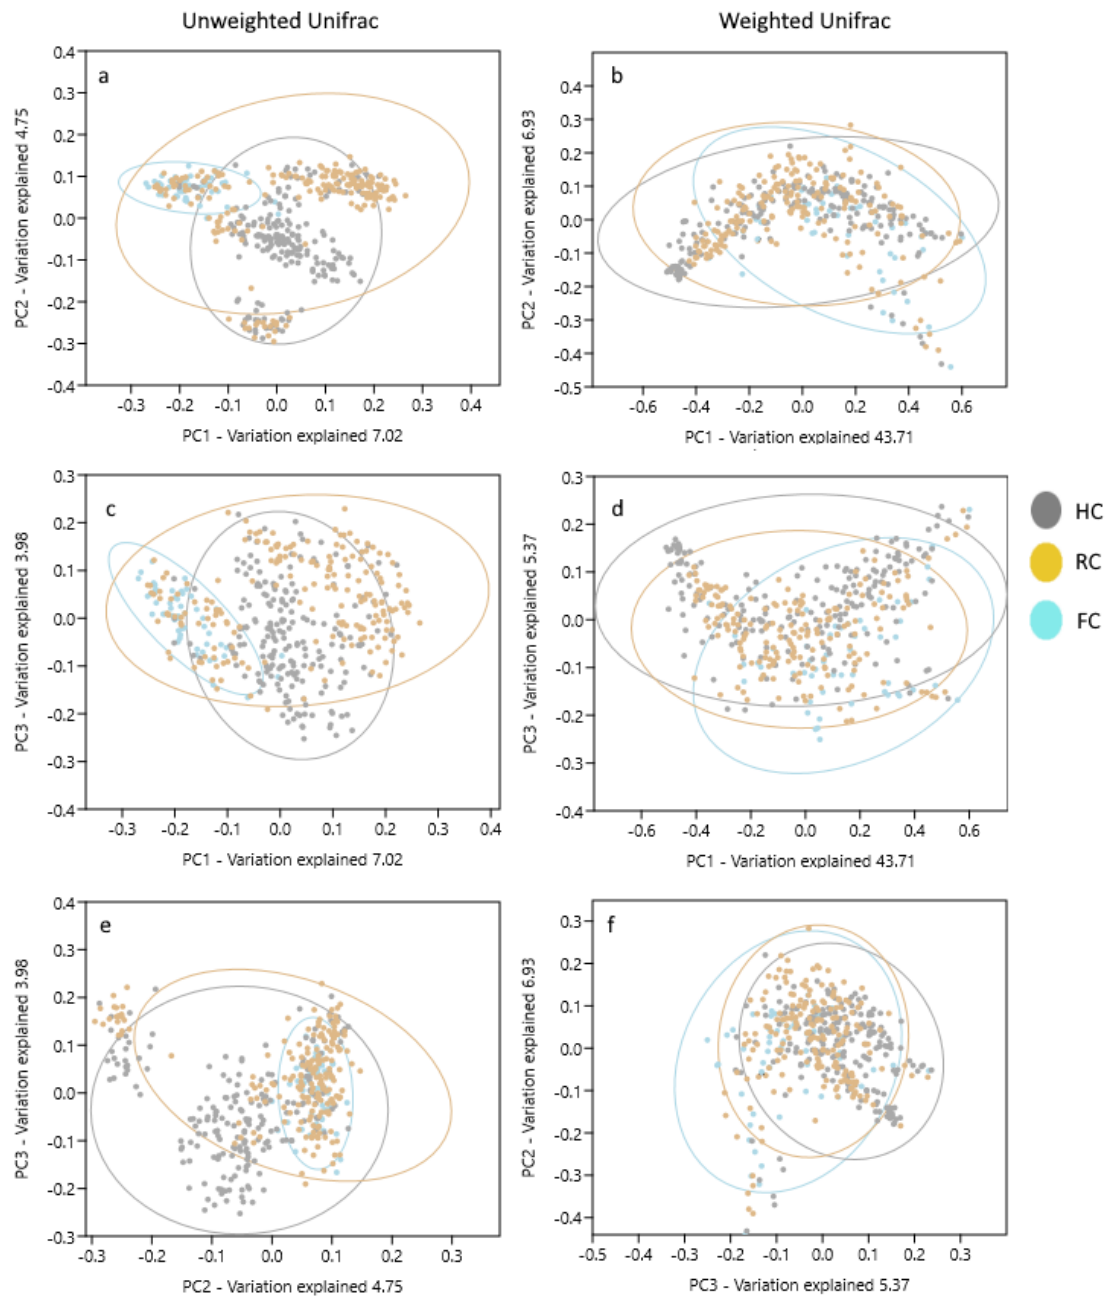

Figure S4. Beta diversity principal coordinates (PCoA) analysis of control groups. Comparison of healthy subjects related (FC) or non-related to IBD patients (HC), and non-related individuals at risk of developing metabolic diseases (RC). The Unifrac distance metric either unweighted (a, c, e) and weighted (b, d, f) was used. Ellipses indicate 95% confidence intervals.

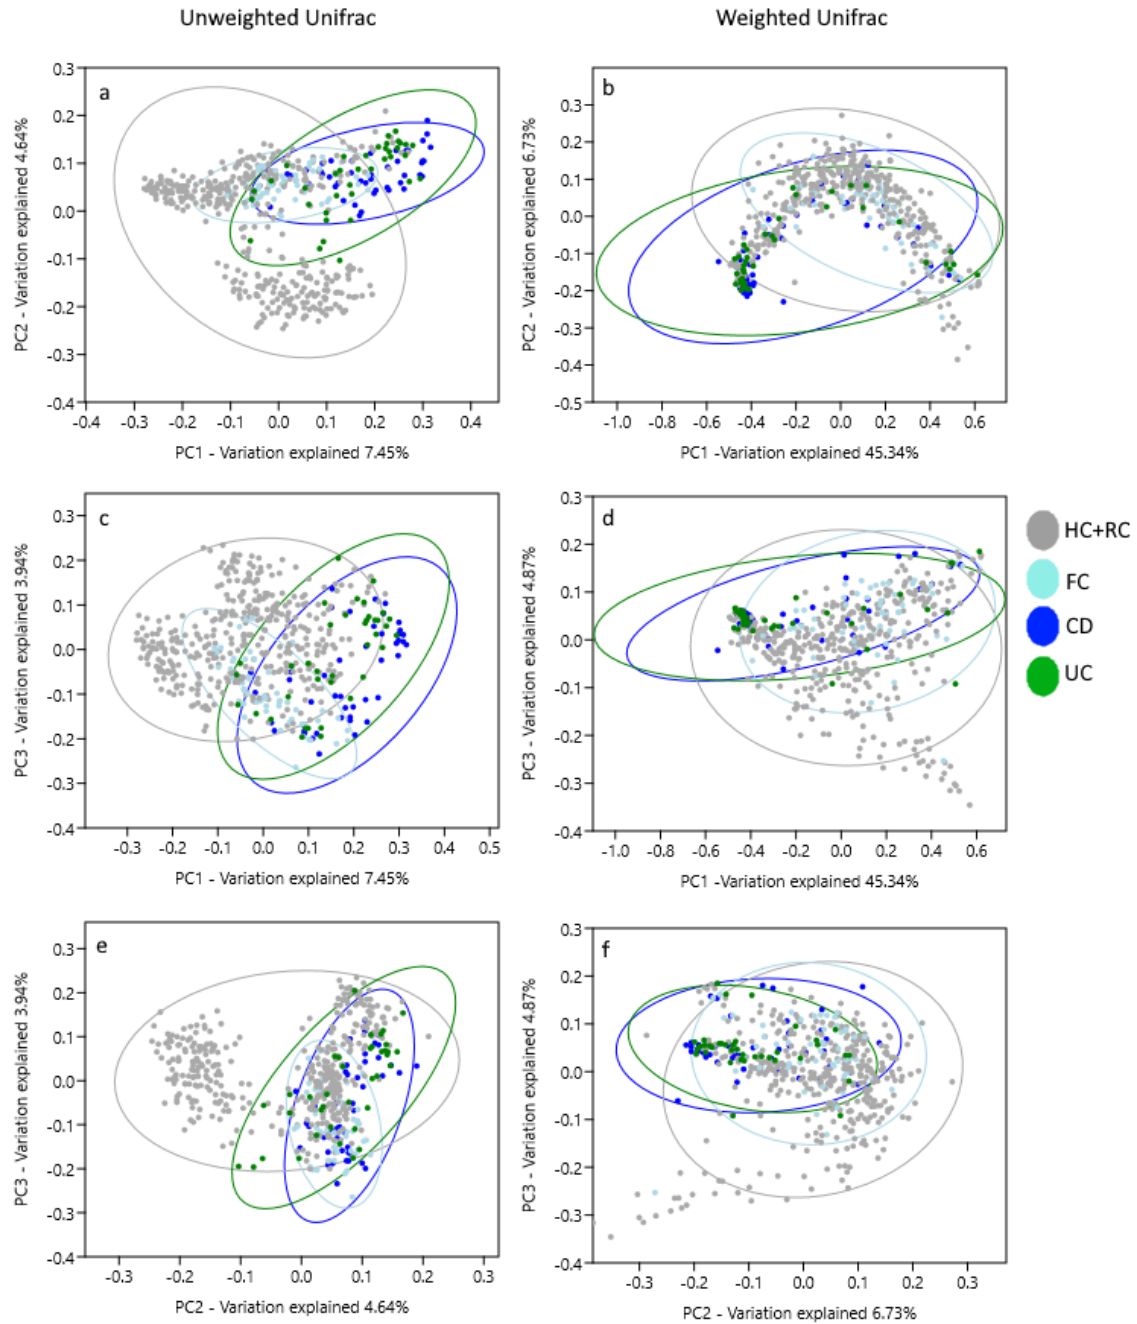

Figure S5. Beta diversity principal coordinates (PCoA) analysis of IBD groups. Comparison of healthy subjects related (FC) or non-related to IBD patients (HC+RC), and Crohn's disease (CD) or ulcerative colitis (UC) patients. The Unifrac distance metric either unweighted (**a, c, e**) and weighted (**b, d, f**) was used. Ellipses indicate 95% confidence intervals.



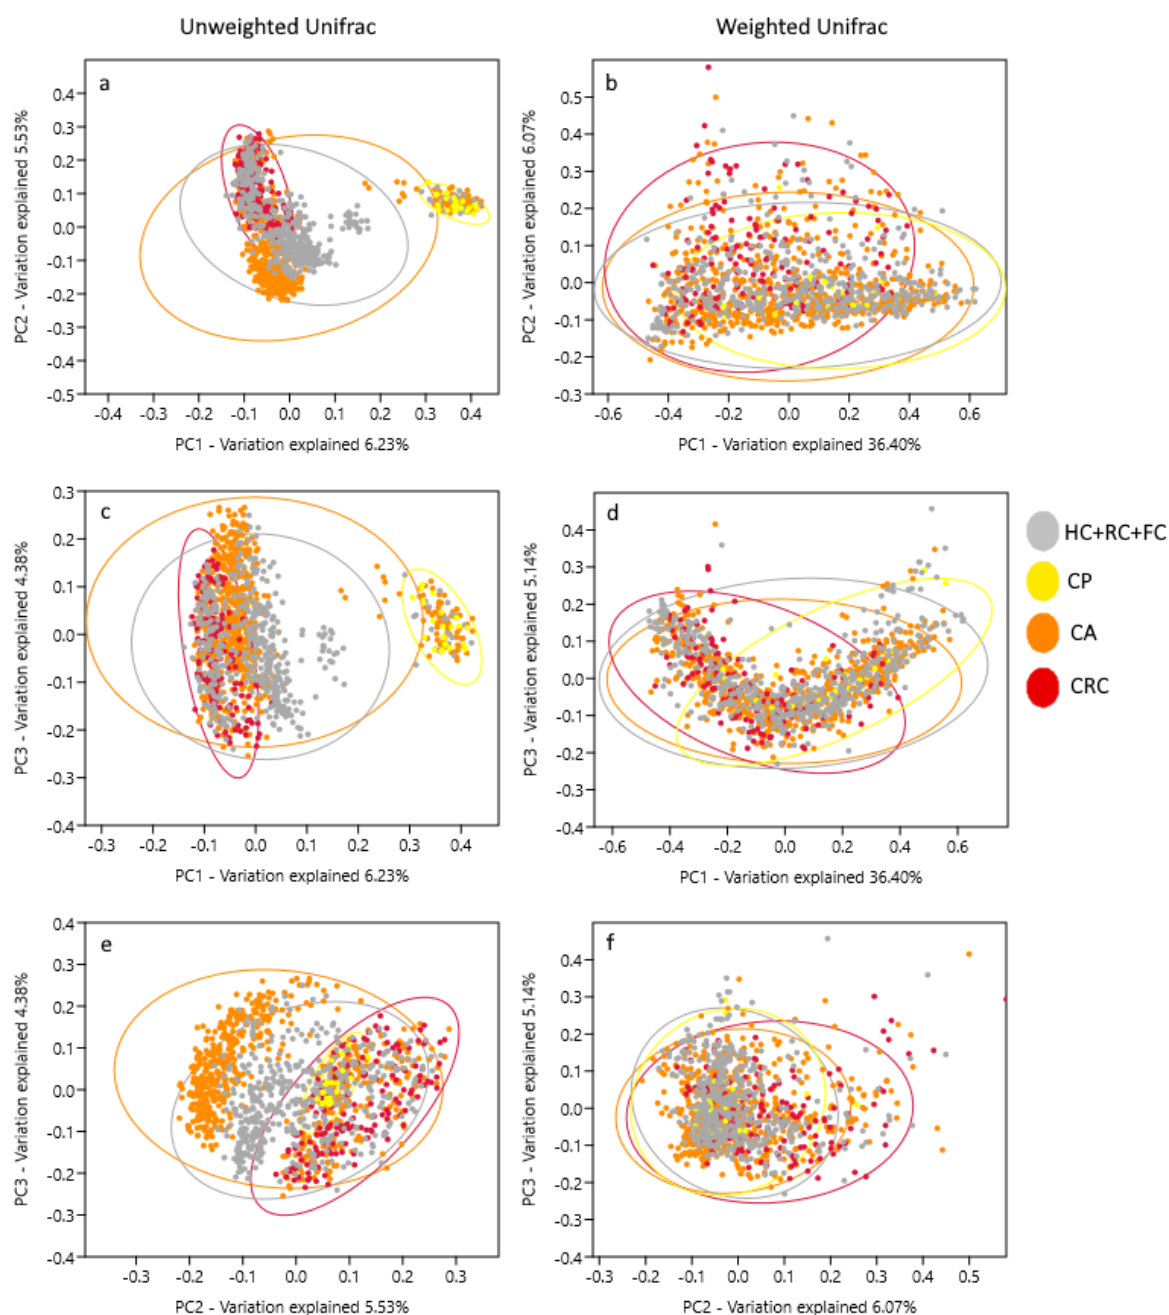

Figure S6. Beta diversity principal coordinates (PCoA) analysis of CRC-related groups. Comparison of healthy subjects (HC+RC+FC) and colon polyposis (CP), colon adenomatosis (CA) and colorectal cancer (CRC) patients. The Unifrac distance metric either unweighted (**a, c, e**) and weighted (**b, d, f**) was used. Ellipses indicate 95% confidence intervals.

| Groups                                              | Metric              |           | DF   | Squares sums | Mean squares | F.Model | R <sup>2</sup> | Pr(>F) | Significance  |
|-----------------------------------------------------|---------------------|-----------|------|--------------|--------------|---------|----------------|--------|---------------|
| <b>HC+RC+FC vs. MD vs. PD vs. WD</b>                | Un-weighted unifrac | Groups    | 3    | 11.706       | 3.9019       | 16.484  | 0.125          | 0.001  | 0.001 < p > 0 |
|                                                     |                     | Residuals | 345  | 81.665       | 0.2367       |         | 0.875          |        |               |
|                                                     |                     | Total     | 348  | 93.371       |              |         | 1              |        |               |
|                                                     | Weighted unifrac    | Groups    | 3    | 4.222        | 1.40732      | 10.685  | 0.085          | 0.001  | 0.001 < p > 0 |
|                                                     |                     | Residuals | 345  | 45.438       | 0.13171      |         | 0.915          |        |               |
|                                                     |                     | Total     | 348  | 49.660       |              |         | 1              |        |               |
| <b>HC vs. RC vs. FC</b>                             | Un-weighted unifrac | Groups    | 2    | 6.187        | 3.09359      | 13.072  | 0.056          | 0.001  | 0.001 < p > 0 |
|                                                     |                     | Residuals | 438  | 103.652      | 0.23665      |         | 0.944          |        |               |
|                                                     |                     | Total     | 440  | 109.839      |              |         | 1              |        |               |
|                                                     | Weighted unifrac    | Groups    | 2    | 3.434        | 1.71706      | 11.988  | 0.052          | 0.001  | 0.001 < p > 0 |
|                                                     |                     | Residuals | 438  | 62.734       | 0.14323      |         | 0.948          |        |               |
|                                                     |                     | Total     | 440  | 66.168       |              |         | 1              |        |               |
| <b>HC+RC+FC vs. CP vs. CA vs. CRC vs. UC vs. CD</b> | Un-weighted unifrac | Groups    | 7    | 22.75        | 3.2498       | 13.58   | 0.066          | 0.001  | 0.001 < p > 0 |
|                                                     |                     | Residuals | 1356 | 324.5        | 0.2393       |         | 0.934          |        |               |
|                                                     |                     | Total     | 1363 | 347.250      |              |         | 1              |        |               |
|                                                     | Weighted unifrac    | Groups    | 7    | 13.317       | 1.90242      | 13.586  | 0.066          | 0.001  | 0.001 < p > 0 |
|                                                     |                     | Residuals | 1356 | 189.882      | 0.14003      |         | 0.934          |        |               |
|                                                     |                     | Total     | 1363 | 203.199      |              |         | 1              |        |               |

Table S11. Group significance for the Beta diversity PCoA determined by ADONIS method.

| Groups                                              | Metric             | Sample size | Groups | Test statistic | p-value |
|-----------------------------------------------------|--------------------|-------------|--------|----------------|---------|
| <b>HC+RC+FC vs. MD vs. PD vs. WD</b>                | Unweighted unifrac | 349         | 4      | 0.49233        | 0.001   |
|                                                     | Weighted unifrac   | 349         | 4      | 0.04007        | 0.024   |
| <b>HC vs. RC vs. FC</b>                             | Unweighted unifrac | 441         | 3      | 0.17641        | 0.001   |
|                                                     | Weighted unifrac   | 441         | 3      | 0.02859        | 0.010   |
| <b>HC+RC+FC vs. CP vs. CA vs. CRC vs. UC vs. CD</b> | Unweighted unifrac | 1364        | 8      | 0.20897        | 0.001   |
|                                                     | Weighted unifrac   | 1364        | 8      | 0.08381        | 0.001   |

Table S12. Group significance for the Beta diversity PCoA determined by ANOSIM method.

| OTU              | HC      | RC      | FC      | MD      | PD      | WD      | UC      | CD      | CP      | CA      | CRC     |
|------------------|---------|---------|---------|---------|---------|---------|---------|---------|---------|---------|---------|
| Firmicutes       | 58.9508 | 52.9856 | 50.5467 | 66.1773 | 62.6186 | 68.6163 | 63.7548 | 56.4517 | 43.9497 | 60.7098 | 57.1596 |
| Bacteroidetes    | 27.2738 | 33.3556 | 44.5428 | 17.0162 | 27.3412 | 15.3187 | 27.6021 | 33.0409 | 50.2231 | 27.0028 | 23.5202 |
| Actinobacteria   | 6.5485  | 5.69965 | 1.7042  | 11.0025 | 3.65092 | 11.9093 | 6.72538 | 3.4058  | 0.65232 | 1.27996 | 1.11119 |
| Proteobacteria   | 3.47177 | 4.78957 | 1.14614 | 1.31932 | 4.4188  | 1.6484  | 1.29773 | 5.31665 | 3.84277 | 6.59364 | 9.79062 |
| Verrucomicrobia  | 2.6703  | 2.57477 | 1.291   | 3.69522 | 1.49473 | 0.97642 | 0.32006 | 1.38157 | 0.00915 | 2.52138 | 3.95754 |
| Euryarchaeota    | 0.58486 | 0.22516 | 0.29896 | 0.11895 | 0.05356 | 0.41173 | 0.03592 | 0.00063 | 0       | 1.08773 | 1.78846 |
| Tenericutes      | 0.34588 | 0.10427 | 0.35122 | 0.04326 | 0.20936 | 0.77846 | 0.05546 | 0.01386 | 0.09713 | 0.36923 | 0.27315 |
| Cyanobacteria    | 0.05804 | 0.1052  | 0.10017 | 0.3432  | 0.14885 | 0.25405 | 0.03963 | 0.01897 | 0.0536  | 0.06255 | 0.05791 |
| Synergistetes    | 0.00977 | 0.05125 | 0.0014  | 0.06155 | 0.00696 | 0.00408 | 0.0001  | 0.0009  | 0.41287 | 0.08478 | 0.15758 |
| Chloroflexi      | 0.00235 | 0.0342  | 0.00083 | 0.10815 | 0       | 0.01794 | 0.00085 | 0.00062 | 0.46939 | 0.02999 | 0.00108 |
| Fusobacteria     | 0.01455 | 0.01969 | 0.00286 | 0.00241 | 0.00417 | 0.00848 | 0.13446 | 0.3524  | 0.01171 | 0.21451 | 2.04536 |
| TM7              | 0.00828 | 0.01905 | 0.00554 | 0.08816 | 0.00696 | 0.00391 | 0.0304  | 0.01304 | 0.00128 | 0.00332 | 0.00137 |
| Lentisphaerae    | 0.01327 | 0.00401 | 0.00547 | 0.00095 | 0.01182 | 0.02071 | 7.6E-05 | 0       | 0.00037 | 0.00599 | 0.01567 |
| Acidobacteria    | 0.01871 | 0.00169 | 8E-05   | 3.4E-05 | 0       | 0.00098 | 3.8E-05 | 0.00012 | 0.00018 | 0.00215 | 0.00343 |
| Spirochaetes     | 6.1E-05 | 3.1E-05 | 1.9E-05 | 0       | 0.03408 | 0       | 3.8E-05 | 5.8E-06 | 0       | 4.4E-05 | 0.05966 |
| [Thermi]         | 0.02065 | 0.00217 | 1.3E-05 | 3.4E-05 | 0       | 0.00147 | 7.6E-05 | 1.2E-05 | 0.16756 | 0.01248 | 0       |
| OP11             | 0       | 0.0197  | 0.0002  | 0.01366 | 0       | 0.00473 | 0       | 0       | 0.00073 | 0.00922 | 0.05252 |
| Planctomycetes   | 0.0039  | 0.00093 | 0       | 0.00017 | 0       | 0       | 0       | 0       | 0.04866 | 0.0027  | 0       |
| Gemmatimonadetes | 0.00183 | 0.00246 | 0       | 0.00095 | 0       | 0.00098 | 0.00092 | 0.00156 | 0.0439  | 0.00216 | 0       |
| Chlorobi         | 0.00047 | 9.3E-05 | 0.00155 | 3.4E-05 | 0       | 0.00799 | 0.00071 | 0.00026 | 0.00421 | 0.0013  | 0.00261 |
| FBP              | 0.00016 | 0.00246 | 8E-05   | 0.00653 | 0       | 0.00228 | 0       | 0       | 0.00457 | 0.00011 | 0       |
| Armatimonadetes  | 0       | 4.6E-05 | 0.00041 | 0.00071 | 0       | 0.00636 | 0       | 0       | 0.00018 | 0.00029 | 0.0003  |
| ZB3              | 0       | 1.5E-05 | 0.0001  | 0       | 0       | 0.00228 | 0       | 1.2E-05 | 0       | 0.00042 | 0.00043 |
| AD3              | 0       | 0       | 1.3E-05 | 0       | 0       | 0.00212 | 0       | 5.8E-06 | 0       | 1.9E-05 | 0       |
| Elusimicrobia    | 0.00028 | 0.00129 | 0       | 0       | 0       | 0       | 0.0005  | 0.00019 | 0.00037 | 0.00184 | 4.8E-05 |
| GN02             | 0       | 0       | 4.5E-05 | 0       | 0       | 0.00179 | 3.8E-05 | 3.5E-05 | 0       | 4.4E-05 | 0       |
| Nitrospirae      | 0.00075 | 0.00026 | 0       | 6.8E-05 | 0       | 0       | 0.00032 | 0.00027 | 0.00146 | 0.00014 | 0       |
| TM6              | 0.00022 | 0.00011 | 0       | 0       | 0       | 0       | 8.9E-05 | 0       | 0       | 0       | 0.00107 |
| Deferribacteres  | 0.00022 | 4.6E-05 | 0       | 0       | 0       | 0       | 0       | 5.8E-06 | 0.00091 | 0.00013 | 1.1E-05 |
| Fibrobacteres    | 0.00022 | 0       | 3.5E-05 | 0       | 0       | 0       | 0       | 0       | 0.00073 | 0       | 0       |
| Crenarchaeota    | 0.00017 | 0       | 0       | 0       | 0       | 0       | 3.8E-05 | 8.7E-05 | 0.00055 | 1.6E-05 | 0       |
| SR1              | 0       | 0.00022 | 0       | 0       | 0       | 0       | 0       | 0       | 0.00055 | 0.0004  | 0       |
| WPS-2            | 2.4E-05 | 0.00017 | 0       | 3.4E-05 | 0       | 0       | 0.00011 | 0.00011 | 0.00055 | 0.0001  | 0       |
| p_               | 1.2E-05 | 0       | 2.6E-05 | 0.00048 | 0       | 0.00016 | 0       | 5.8E-06 | 0       | 5.9E-05 | 0       |
| BRC1             | 8.5E-05 | 0       | 9.6E-06 | 0       | 0       | 0       | 5.1E-05 | 5.2E-05 | 0.00037 | 2.8E-05 | 0       |
| OD1              | 2.4E-05 | 6.2E-05 | 2.2E-05 | 0       | 0       | 0.00016 | 2.5E-05 | 7E-05   | 0.00037 | 9.4E-06 | 0       |
| SAR406           | 0       | 9.3E-05 | 0       | 0       | 0       | 0       | 1.3E-05 | 5.2E-05 | 0.00037 | 5.9E-05 | 0       |
| WS3              | 2.4E-05 | 4.6E-05 | 0       | 0       | 0       | 0       | 1.3E-05 | 5.2E-05 | 0.00018 | 0.00033 | 0.00018 |
| Thermotogae      | 0       | 0       | 5.7E-05 | 0       | 0       | 0       | 5.1E-05 | 2.9E-05 | 0.00018 | 1.3E-05 | 0       |
| Caldiserica      | 0       | 0       | 1.9E-05 | 0       | 0       | 0.00016 | 0       | 0       | 0       | 6.3E-06 | 0       |
| MVS-104          | 0       | 0       | 0       | 0.0001  | 0       | 0       | 0       | 0       | 0       | 0       | 0       |
| AC1              | 0       | 0       | 2.6E-05 | 0       | 0       | 0       | 0       | 0       | 0       | 5.9E-05 | 3.2E-05 |
| NC10             | 0       | 0       | 2.2E-05 | 0       | 0       | 0       | 0       | 0       | 0       | 5.6E-05 | 0       |
| H-178            | 0       | 0       | 0       | 3.4E-05 | 0       | 0       | 0       | 0       | 0       | 0       | 0       |
| GOUTA4           | 0       | 1.5E-05 | 0       | 0       | 0       | 0       | 0       | 0       | 0       | 3.1E-06 | 3.2E-05 |
| OP3              | 0       | 1.5E-05 | 0       | 0       | 0       | 0       | 0       | 0       | 0       | 2.8E-05 | 0       |
| WWE1             | 0       | 1.5E-05 | 0       | 0       | 0       | 0       | 0       | 0       | 0       | 2.2E-05 | 0       |
| WS1              | 0       | 0       | 9.6E-06 | 0       | 0       | 0       | 0       | 0       | 0       | 1.6E-05 | 0       |
| TPD-58           | 0       | 1.5E-05 | 0       | 0       | 0       | 0       | 0       | 5.8E-06 | 0       | 3.1E-06 | 1.1E-05 |
| OP1              | 1.2E-05 | 0       | 0       | 0       | 0       | 0       | 0       | 5.8E-06 | 0       | 1.3E-05 | 0       |
| LCP-89           | 0       | 0       | 0       | 0       | 0       | 0       | 0       | 0       | 0       | 9.4E-06 | 0       |
| NKB19            | 0       | 0       | 0       | 0       | 0       | 0       | 0       | 0       | 0       | 9.4E-06 | 0       |
| OP8              | 0       | 0       | 6.4E-06 | 0       | 0       | 0       | 0       | 0       | 0       | 3.1E-06 | 0       |
| WS5              | 0       | 0       | 6.4E-06 | 0       | 0       | 0       | 0       | 0       | 0       | 6.3E-06 | 0       |
| GN04             | 0       | 0       | 0       | 0       | 0       | 0       | 0       | 0       | 0       | 6.3E-06 | 0       |
| SC4              | 0       | 0       | 0       | 0       | 0       | 0       | 0       | 0       | 0       | 6.3E-06 | 0       |
| VHS-B3-43        | 0       | 0       | 0       | 0       | 0       | 0       | 0       | 0       | 0       | 6.3E-06 | 0       |
| Chlamydiae       | 0       | 0       | 3.2E-06 | 0       | 0       | 0       | 0       | 0       | 0       | 3.1E-06 | 0       |
| OP9              | 0       | 0       | 0       | 0       | 0       | 0       | 0       | 0       | 0       | 3.1E-06 | 0       |

Table S13. Average OTU composition (%) at phylum level.
